# Supplementary material for: Maternal HIV infection is associated with distinct systemic cytokine profiles throughout pregnancy in South African women
Source: PubMed Central journal article supplement (PMC8115111; doi:10.1038/s41598-021-89551-3), 2021-05-12
Supplement: 41598_2021_89551_MOESM1_ESM.pdf [file 41598_2021_89551_MOESM1_ESM.pdf]

# Supplementary data

## Title

Maternal HIV infection is associated with distinct systemic cytokine profiles throughout pregnancy in South African women

## Authors

Charlene Akoto<sup>1</sup>, Shane A. Norris<sup>2</sup>, Joris Hemelaar<sup>2,3\*</sup>

## Affiliations

<sup>1</sup> Nuffield Department of Women's & Reproductive Health, University of Oxford, The Women's Centre, John Radcliffe Hospital, Oxford, United Kingdom.

<sup>2</sup> South African Medical Research Council Developmental Pathways for Health Research Unit, Department of Paediatrics, School of Clinical Medicine, University of the Witwatersrand, Johannesburg, South Africa.

<sup>3</sup> National Perinatal Epidemiology Unit, Nuffield Department of Population Health, University of Oxford, Oxford, United Kingdom.

## \* Correspondence:

Dr Joris Hemelaar

National Perinatal Epidemiology Unit, Nuffield Department of Population Health, University of Oxford, Richard Doll Building, Old Road Campus, Oxford, OX3 7LF, United Kingdom.

Email: [jorishemelaar@gmail.com](mailto:jorishemelaar@gmail.com)

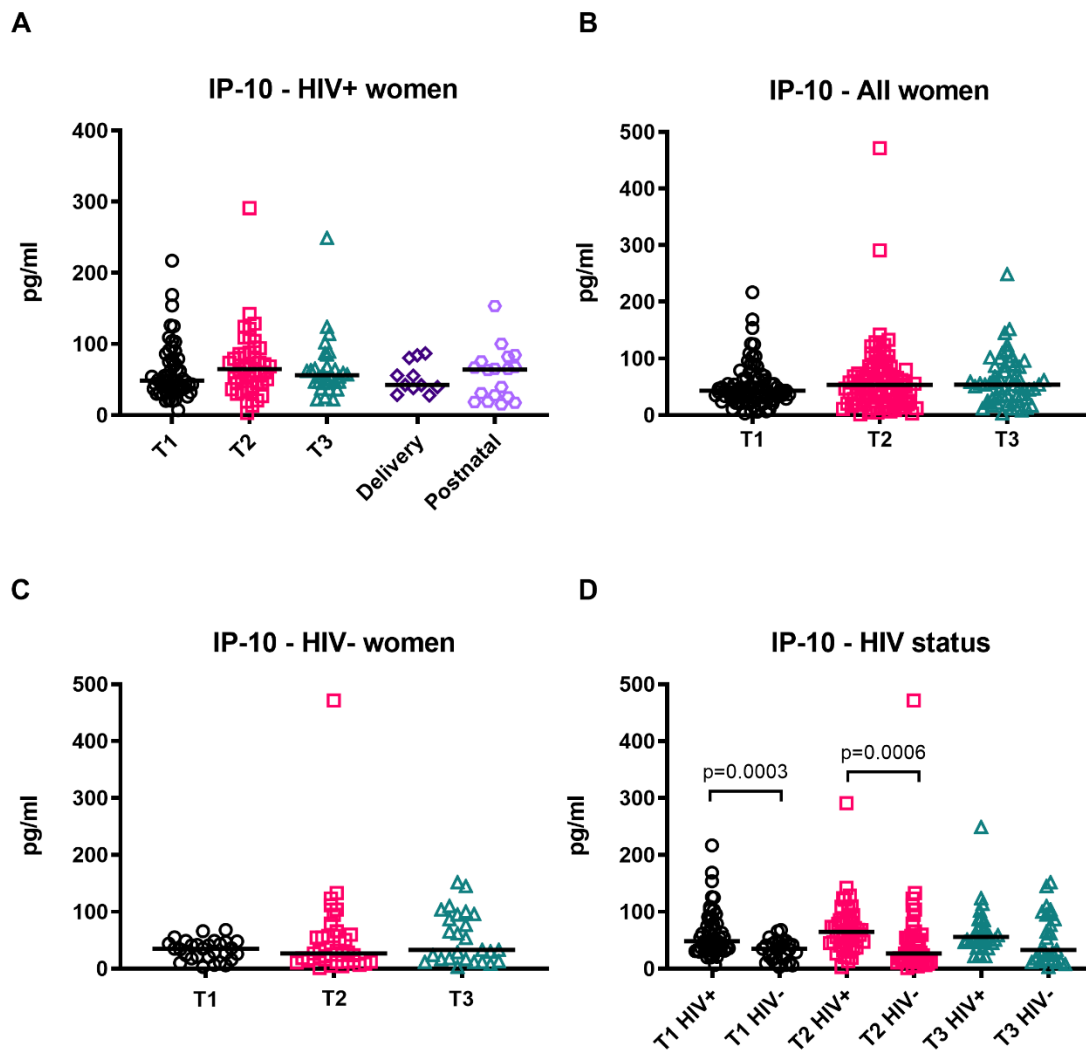

**Supplementary Figure 1. Systemic IP-10 concentrations across pregnancy.** IP-10 concentration was measured in maternal plasma collected during the first (T1), second (T2) and third (T3) trimester in women living with HIV (HIV+ women) and HIV-negative women (HIV- women), as well as at delivery and six weeks postnatal for n=11 and n=18 HIV+ women, respectively. IP-10 measured in **(A)** HIV+ women, **(B)** all women (both HIV positive and HIV negative), **(C)** HIV- women and **(D)** HIV+ versus HIV- women. The Mann-Whitney U-test was used to compare median values between two groups within a trimester. The Kruskal-Wallis test was used to compare median values of more than two groups followed by Dunn's multiple comparisons test to determine differences between two groups.

|                   | Trimester       |        |                 |        |                   |        | Delivery         | Postnatal | P               |             |              |
|-------------------|-----------------|--------|-----------------|--------|-------------------|--------|------------------|-----------|-----------------|-------------|--------------|
|                   | 1               |        | 2               |        | 3                 |        |                  |           |                 |             |              |
|                   | n               |        | n               |        | n                 |        |                  |           |                 |             |              |
| <b>All Women</b>  |                 |        |                 |        |                   |        |                  |           |                 |             |              |
| IL-1 $\beta$      | 23 <sub>a</sub> | 18.9%  | 16 <sub>a</sub> | 16.2%  | 9 <sub>a</sub>    | 13.2%  |                  |           |                 | 0.625       |              |
| TNF- $\alpha$     | 1 <sub>a</sub>  | 0.8%   | 4 <sub>a</sub>  | 4.0%   | 2 <sub>a</sub>    | 2.9%   |                  |           |                 | 0.261       |              |
| IP-10             | 83 <sub>a</sub> | 68.0%  | 82 <sub>b</sub> | 82.8%  | 57 <sub>a,b</sub> | 83.8%  |                  |           |                 | <b>0.01</b> |              |
| IL-8              | 4 <sub>a</sub>  | 3.3%   | 6 <sub>a</sub>  | 6.1%   | 2 <sub>a</sub>    | 2.9%   |                  |           |                 | 0.559       |              |
| IFN $\alpha$ 2    | 6 <sub>a</sub>  | 4.9%   | 7 <sub>a</sub>  | 7.1%   | 7 <sub>a</sub>    | 10.3%  |                  |           |                 | 0.374       |              |
| IFN $\beta$       | 36 <sub>a</sub> | 29.5%  | 26 <sub>a</sub> | 26.3%  | 15 <sub>a</sub>   | 22.1%  |                  |           |                 | 0.528       |              |
| IFN $\lambda$ 1   | 12 <sub>a</sub> | 9.8%   | 33 <sub>b</sub> | 33.3%  | 25 <sub>b</sub>   | 36.8%  |                  |           |                 | <b>0.00</b> |              |
| IFN $\lambda$ 2/3 | 35 <sub>a</sub> | 28.7%  | 33 <sub>a</sub> | 33.3%  | 16 <sub>a</sub>   | 23.5%  |                  |           |                 | 0.398       |              |
| IFN $\gamma$      | 3 <sub>a</sub>  | 2.5%   | 4 <sub>a</sub>  | 4.0%   | 3 <sub>a</sub>    | 4.4%   |                  |           |                 | 0.772       |              |
| IL-2              | 19 <sub>a</sub> | 15.7%  | 11 <sub>a</sub> | 11.1%  | 10 <sub>a</sub>   | 14.7%  |                  |           |                 | 0.642       |              |
| IL-12p70          | 3 <sub>a</sub>  | 2.5%   | 4 <sub>a</sub>  | 4.0%   | 3 <sub>a</sub>    | 4.4%   |                  |           |                 | 0.772       |              |
| IL-4              | 22 <sub>a</sub> | 18.2%  | 11 <sub>a</sub> | 11.1%  | 14 <sub>a</sub>   | 20.6%  |                  |           |                 | 0.198       |              |
| IL-5              | 11 <sub>a</sub> | 9.1%   | 11 <sub>a</sub> | 11.1%  | 13 <sub>a</sub>   | 19.1%  |                  |           |                 | 0.115       |              |
| IL-13             | 22 <sub>a</sub> | 18.2%  | 16 <sub>a</sub> | 16.2%  | 11 <sub>a</sub>   | 16.2%  |                  |           |                 | 0.920       |              |
| IL-17A            | 19 <sub>a</sub> | 15.7%  | 7 <sub>a</sub>  | 7.1%   | 9 <sub>a</sub>    | 13.2%  |                  |           |                 | 0.151       |              |
| IL-17F            | 36 <sub>a</sub> | 29.8%  | 24 <sub>a</sub> | 24.2%  | 17 <sub>a</sub>   | 25.0%  |                  |           |                 | 0.636       |              |
| IL-21             | 13 <sub>a</sub> | 10.7%  | 10 <sub>a</sub> | 10.1%  | 5 <sub>a</sub>    | 7.4%   |                  |           |                 | 0.768       |              |
| IL-22             | 11 <sub>a</sub> | 10.9%  | 11 <sub>a</sub> | 12.8%  | 8 <sub>a</sub>    | 12.9%  |                  |           |                 | 0.909       |              |
| IL-6              | 4 <sub>a</sub>  | 3.3%   | 5 <sub>a</sub>  | 5.1%   | 2 <sub>a</sub>    | 2.9%   |                  |           |                 | 0.732       |              |
| IL-9              | 15 <sub>a</sub> | 12.4%  | 12 <sub>a</sub> | 12.1%  | 13 <sub>a</sub>   | 19.1%  |                  |           |                 | 0.373       |              |
| GM-CSF            | 3 <sub>a</sub>  | 2.5%   | 6 <sub>a</sub>  | 6.1%   | 2 <sub>a</sub>    | 2.9%   |                  |           |                 | 0.387       |              |
| IL-10             | 7 <sub>a</sub>  | 5.7%   | 10 <sub>a</sub> | 10.1%  | 5 <sub>a</sub>    | 7.4%   |                  |           |                 | 0.454       |              |
| <b>HIV+ women</b> |                 |        |                 |        |                   |        |                  |           |                 |             |              |
| IL-1 $\beta$      | 2 <sub>a</sub>  | 3.7%   | 3 <sub>a</sub>  | 6.7%   | 3 <sub>a</sub>    | 9.7%   | 0 <sup>1</sup>   | 0.0%      | 0 <sup>1</sup>  | 0.0%        | 0.617        |
| TNF- $\alpha$     | 1 <sub>a</sub>  | 1.9%   | 3 <sub>a</sub>  | 6.7%   | 2 <sub>a</sub>    | 6.5%   | 0 <sup>1</sup>   | 0.0%      | 0 <sup>1</sup>  | 0.0%        | 0.613        |
| IP-10             | 54 <sup>1</sup> | 100.0% | 45 <sup>1</sup> | 100.0% | 31 <sup>1</sup>   | 100.0% | 11 <sup>1</sup>  | 100.0%    | 18 <sup>1</sup> | 100.0%      | --           |
| IL-8              | 2 <sub>a</sub>  | 3.7%   | 3 <sub>a</sub>  | 6.7%   | 0 <sup>1</sup>    | 0.0%   | 0 <sup>1</sup>   | 0.0%      | 0 <sup>1</sup>  | 0.0%        | 0.603        |
| IFN $\alpha$ 2    | 3 <sub>a</sub>  | 5.6%   | 3 <sub>a</sub>  | 6.7%   | 5 <sub>a</sub>    | 16.1%  | 2 <sub>a</sub>   | 18.2%     | 0 <sup>1</sup>  | 0.0%        | 0.162        |
| IFN $\beta$       | 7 <sub>a</sub>  | 13.0%  | 6 <sub>a</sub>  | 13.3%  | 3 <sub>a</sub>    | 9.7%   | 1 <sub>a</sub>   | 9.1%      | 0 <sup>1</sup>  | 0.0%        | 0.614        |
| IFN $\lambda$ 1   | 5 <sub>a</sub>  | 9.3%   | 21 <sub>b</sub> | 46.7%  | 17 <sub>b</sub>   | 54.8%  | 1 <sub>a,b</sub> | 9.1%      | 0 <sup>1</sup>  | 0.0%        | <b>0.000</b> |
| IFN $\lambda$ 2/3 | 4 <sub>a</sub>  | 7.4%   | 7 <sub>a</sub>  | 15.6%  | 2 <sub>a</sub>    | 6.5%   | 3 <sub>a</sub>   | 27.3%     | 0 <sup>1</sup>  | 0.0%        | 0.097        |
| IFN $\gamma$      | 0 <sup>1</sup>  | 0.0%   | 1 <sub>a</sub>  | 2.2%   | 1 <sub>a</sub>    | 3.2%   | 0 <sup>1</sup>   | 0.0%      | 0 <sup>1</sup>  | 0.0%        | 0.559        |
| IL-2              | 17 <sub>a</sub> | 31.5%  | 9 <sub>a</sub>  | 20.0%  | 7 <sub>a</sub>    | 22.6%  | 4 <sub>a</sub>   | 36.4%     | 2 <sub>a</sub>  | 11.1%       | 0.345        |
| IL-12p70          | 2 <sub>a</sub>  | 3.7%   | 4 <sub>a</sub>  | 8.9%   | 3 <sub>a</sub>    | 9.7%   | 1 <sub>a</sub>   | 9.1%      | 0 <sup>1</sup>  | 0.0%        | 0.489        |
| IL-4              | 11 <sub>a</sub> | 20.4%  | 6 <sub>a</sub>  | 13.3%  | 8 <sub>a</sub>    | 25.8%  | 2 <sub>a</sub>   | 18.2%     | 0 <sup>1</sup>  | 0.0%        | 0.130        |
| IL-5              | 9 <sub>a</sub>  | 16.7%  | 10 <sub>a</sub> | 22.2%  | 10 <sub>a</sub>   | 32.3%  | 3 <sub>a</sub>   | 27.3%     | 1 <sub>a</sub>  | 5.6%        | 0.190        |
| IL-13             | 9 <sub>a</sub>  | 16.7%  | 8 <sub>a</sub>  | 17.8%  | 6 <sub>a</sub>    | 19.4%  | 2 <sub>a</sub>   | 18.2%     | 1 <sub>a</sub>  | 5.6%        | 0.772        |
| IL-17A            | 16 <sub>a</sub> | 29.6%  | 6 <sub>a</sub>  | 13.3%  | 6 <sub>a</sub>    | 19.4%  | 5 <sub>a</sub>   | 45.5%     | 4 <sub>a</sub>  | 22.2%       | 0.132        |
| IL-17F            | 20 <sub>a</sub> | 37.0%  | 13 <sub>a</sub> | 28.9%  | 8 <sub>a</sub>    | 25.8%  | 5 <sub>a</sub>   | 45.5%     | 3 <sub>a</sub>  | 16.7%       | 0.377        |
| IL-21             | 3 <sub>a</sub>  | 5.6%   | 3 <sub>a</sub>  | 6.7%   | 2 <sub>a</sub>    | 6.5%   | 2 <sub>a</sub>   | 18.2%     | 0 <sup>1</sup>  | 0.0%        | 0.443        |
| IL-22             | 8 <sub>a</sub>  | 14.8%  | 7 <sub>a</sub>  | 15.6%  | 4 <sub>a</sub>    | 12.9%  | 4 <sub>a</sub>   | 36.4%     | 2 <sub>a</sub>  | 11.1%       | 0.460        |
| IL-6              | 4 <sub>a</sub>  | 7.4%   | 4 <sub>a</sub>  | 8.9%   | 2 <sub>a</sub>    | 6.5%   | 1 <sub>a</sub>   | 9.1%      | 1 <sub>a</sub>  | 5.6%        | 1.000        |
| IL-9              | 11 <sub>a</sub> | 20.4%  | 6 <sub>a</sub>  | 13.3%  | 7 <sub>a</sub>    | 22.6%  | 2 <sub>a</sub>   | 18.2%     | 2 <sub>a</sub>  | 11.1%       | 0.771        |
| GM-CSF            | 2 <sub>a</sub>  | 3.7%   | 2 <sub>a</sub>  | 4.4%   | 2 <sub>a</sub>    | 6.5%   | 0 <sup>1</sup>   | 0.0%      | 0 <sup>1</sup>  | 0.0%        | 0.924        |
| IL-10             | 7 <sub>a</sub>  | 13.0%  | 7 <sub>a</sub>  | 15.6%  | 5 <sub>a</sub>    | 16.1%  | 3 <sub>a</sub>   | 27.3%     | 1 <sub>a</sub>  | 5.6%        | 0.584        |
| <b>HIV- women</b> |                 |        |                 |        |                   |        |                  |           |                 |             |              |
| IL-1 $\beta$      | 21 <sub>a</sub> | 30.9%  | 13 <sub>a</sub> | 24.1%  | 6 <sub>a</sub>    | 16.2%  |                  |           |                 |             | 0.245        |

|                                   |                 |       |                 |       |                 |       |              |
|-----------------------------------|-----------------|-------|-----------------|-------|-----------------|-------|--------------|
| <b>TNF-<math>\alpha</math></b>    | 0 <sup>1</sup>  | 0.0%  | 1 <sub>a</sub>  | 1.9%  | 0 <sup>1</sup>  | 0.0%  | 0.572        |
| <b>IP-10</b>                      | 29 <sub>a</sub> | 42.6% | 37 <sub>b</sub> | 68.5% | 26 <sub>b</sub> | 70.3% | <b>0.003</b> |
| <b>IL-8</b>                       | 2 <sub>a</sub>  | 2.9%  | 3 <sub>a</sub>  | 5.6%  | 2 <sub>a</sub>  | 5.4%  | 0.693        |
| <b>IFN<math>\alpha</math>2</b>    | 3 <sub>a</sub>  | 4.4%  | 4 <sub>a</sub>  | 7.4%  | 2 <sub>a</sub>  | 5.4%  | 0.905        |
| <b>IFN<math>\beta</math></b>      | 29 <sub>a</sub> | 42.6% | 20 <sub>a</sub> | 37.0% | 12 <sub>a</sub> | 32.4% | 0.567        |
| <b>IFN<math>\lambda</math>1</b>   | 7 <sub>a</sub>  | 10.3% | 12 <sub>a</sub> | 22.2% | 8 <sub>a</sub>  | 21.6% | 0.152        |
| <b>IFN<math>\lambda</math>2/3</b> | 31 <sub>a</sub> | 45.6% | 26 <sub>a</sub> | 48.1% | 14 <sub>a</sub> | 37.8% | 0.647        |
| <b>IFN<math>\gamma</math></b>     | 3 <sub>a</sub>  | 4.4%  | 3 <sub>a</sub>  | 5.6%  | 2 <sub>a</sub>  | 5.4%  | 1.000        |
| <b>IL-2</b>                       | 2 <sub>a</sub>  | 3.0%  | 2 <sub>a</sub>  | 3.7%  | 3 <sub>a</sub>  | 8.1%  | 0.483        |
| <b>IL-12p70</b>                   | 1 <sub>a</sub>  | 1.5%  | 0 <sup>1</sup>  | 0.0%  | 0 <sup>1</sup>  | 0.0%  | 1.000        |
| <b>IL-4</b>                       | 11 <sub>a</sub> | 16.4% | 5 <sub>a</sub>  | 9.3%  | 6 <sub>a</sub>  | 16.2% | 0.472        |
| <b>IL-5</b>                       | 2 <sub>a</sub>  | 3.0%  | 1 <sub>a</sub>  | 1.9%  | 3 <sub>a</sub>  | 8.1%  | 0.321        |
| <b>IL-13</b>                      | 13 <sub>a</sub> | 19.4% | 8 <sub>a</sub>  | 14.8% | 5 <sub>a</sub>  | 13.5% | 0.733        |
| <b>IL-17A</b>                     | 3 <sub>a</sub>  | 4.5%  | 1 <sub>a</sub>  | 1.9%  | 3 <sub>a</sub>  | 8.1%  | 0.426        |
| <b>IL-17F</b>                     | 16 <sub>a</sub> | 23.9% | 11 <sub>a</sub> | 20.4% | 9 <sub>a</sub>  | 24.3% | 0.885        |
| <b>IL-21</b>                      | 10 <sub>a</sub> | 14.9% | 7 <sub>a</sub>  | 13.0% | 3 <sub>a</sub>  | 8.1%  | 0.620        |
| <b>IL-22</b>                      | 3 <sub>a</sub>  | 6.4%  | 4 <sub>a</sub>  | 9.8%  | 4 <sub>a</sub>  | 12.9% | 0.567        |
| <b>IL-6</b>                       | 0 <sup>1</sup>  | 0.0%  | 1 <sub>a</sub>  | 1.9%  | 0 <sup>1</sup>  | 0.0%  | 0.572        |
| <b>IL-9</b>                       | 4 <sub>a</sub>  | 6.0%  | 6 <sub>a</sub>  | 11.1% | 6 <sub>a</sub>  | 16.2% | 0.256        |
| <b>GM-CSF</b>                     | 1 <sub>a</sub>  | 1.5%  | 4 <sub>a</sub>  | 7.4%  | 0 <sup>1</sup>  | 0.0%  | 0.127        |
| <b>IL-10</b>                      | 0 <sup>1</sup>  | 0.0%  | 3 <sub>a</sub>  | 5.6%  | 0 <sup>1</sup>  | 0.0%  | 0.050        |

**Supplementary Table 1. Systemic cytokines across pregnancy.** Cytokines and chemokines were measured in maternal plasma collected during the first, second and third trimester in all women studied (both women living with HIV (HIV+ women) and HIV-negative women (HIV- women)), as well as at delivery and six weeks postnatal for 11 and 18 women living with HIV, respectively. Data presented are the number and percentage of samples in which cytokines were detected by multiplex cytokine assay. The Chi-square test or Fisher's exact test was used for statistical comparisons as appropriate. Values in the same row not sharing the same subscript are significantly different in the two-sided test of equality for column proportions. Cells with no subscript are not included in the test. <sup>1</sup>This category is not used in comparisons because its column proportion is equal to zero or one.

|                 |    | HIV Status |        |          |       |              | Preterm Status |        |      |       |              | SGA Status |       |        |       |              |
|-----------------|----|------------|--------|----------|-------|--------------|----------------|--------|------|-------|--------------|------------|-------|--------|-------|--------------|
|                 |    | Positive   |        | Negative |       | P            | Preterm        |        | Term |       | P            | SGA        |       | no SGA |       | P            |
|                 |    | n          |        | n        |       |              | n              |        | n    |       |              | n          |       | n      |       |              |
| <b>IL-1β</b>    | T1 | 2          | 3.7%   | 21       | 30.9% | <b>0.000</b> | 12             | 25.5%  | 11   | 14.7% | 0.158        | 6          | 20.7% | 17     | 18.3% | 0.789        |
|                 | T2 | 3          | 6.7%   | 13       | 24.1% | <b>0.027</b> | 6              | 19.4%  | 10   | 14.7% | 0.770        | 5          | 21.7% | 11     | 14.5% | 0.518        |
|                 | T3 | 3          | 9.7%   | 6        | 16.2% | 0.494        | 0              | 0.0%   | 9    | 13.6% | 1.000        | 4          | 22.2% | 5      | 10.0% | 0.231        |
| <b>TNF-α</b>    | T1 | 1          | 1.9%   | 0        | 0.0%  | 0.443        | 0              | 0.0%   | 1    | 1.3%  | 1.000        | 1          | 3.4%  | 0      | 0.0%  | 0.238        |
|                 | T2 | 3          | 6.7%   | 1        | 1.9%  | 0.327        | 1              | 3.2%   | 3    | 4.4%  | 1.000        | 2          | 8.7%  | 2      | 2.6%  | 0.230        |
|                 | T3 | 2          | 6.5%   | 0        | 0.0%  | 0.204        | 0              | 0.0%   | 2    | 3.0%  | 1.000        | 1          | 5.6%  | 1      | 2.0%  | 0.462        |
| <b>IP-10</b>    | T1 | 54         | 100.0% | 29       | 42.6% | <b>0.000</b> | 28             | 59.6%  | 55   | 73.3% | 0.162        | 22         | 75.9% | 61     | 65.6% | 0.366        |
|                 | T2 | 45         | 100.0% | 37       | 68.5% | <b>0.000</b> | 25             | 80.6%  | 57   | 83.8% | 0.776        | 20         | 87.0% | 62     | 81.6% | 0.755        |
|                 | T3 | 31         | 100.0% | 26       | 70.3% | <b>0.001</b> | 2              | 100.0% | 55   | 83.3% | 1.000        | 14         | 77.8% | 43     | 86.0% | 0.464        |
| <b>IL-8</b>     | T1 | 2          | 3.7%   | 2        | 2.9%  | 1.000        | 1              | 2.1%   | 3    | 4.0%  | 1.000        | 2          | 6.9%  | 2      | 2.2%  | 0.239        |
|                 | T2 | 3          | 6.7%   | 3        | 5.6%  | 1.000        | 3              | 9.7%   | 3    | 4.4%  | 0.374        | 2          | 8.7%  | 4      | 5.3%  | 0.621        |
|                 | T3 | 0          | 0.0%   | 2        | 5.4%  | 0.496        | 0              | 0.0%   | 2    | 3.0%  | 1.000        | 0          | 0.0%  | 2      | 4.0%  | 1.000        |
| <b>IFNα2</b>    | T1 | 3          | 5.6%   | 3        | 4.4%  | 1.000        | 0              | 0.0%   | 6    | 8.0%  | 0.081        | 1          | 3.4%  | 5      | 5.4%  | 1.000        |
|                 | T2 | 3          | 6.7%   | 4        | 7.4%  | 1.000        | 2              | 6.5%   | 5    | 7.4%  | 1.000        | 3          | 13.0% | 4      | 5.3%  | 0.348        |
|                 | T3 | 5          | 16.1%  | 2        | 5.4%  | 0.233        | 1              | 50.0%  | 6    | 9.1%  | 0.197        | 2          | 11.1% | 5      | 10.0% | 1.000        |
| <b>IFNβ</b>     | T1 | 7          | 13.0%  | 29       | 42.6% | <b>0.001</b> | 19             | 40.4%  | 17   | 22.7% | <b>0.043</b> | 6          | 20.7% | 30     | 32.3% | 0.233        |
|                 | T2 | 6          | 13.3%  | 20       | 37.0% | <b>0.011</b> | 9              | 29.0%  | 17   | 25.0% | 0.806        | 6          | 26.1% | 20     | 26.3% | 1.000        |
|                 | T3 | 3          | 9.7%   | 12       | 32.4% | <b>0.038</b> | 0              | 0.0%   | 15   | 22.7% | 1.000        | 4          | 22.2% | 11     | 22.0% | 1.000        |
| <b>IFNλ1</b>    | T1 | 5          | 9.3%   | 7        | 10.3% | 1.000        | 2              | 4.3%   | 10   | 13.3% | 0.127        | 3          | 10.3% | 9      | 9.7%  | 1.000        |
|                 | T2 | 21         | 46.7%  | 12       | 22.2% | <b>0.018</b> | 11             | 35.5%  | 22   | 32.4% | 0.820        | 10         | 43.5% | 23     | 30.3% | 0.313        |
|                 | T3 | 17         | 54.8%  | 8        | 21.6% | <b>0.006</b> | 1              | 50.0%  | 24   | 36.4% | 1.000        | 8          | 44.4% | 17     | 34.0% | 0.570        |
| <b>IFNλ2/3</b>  | T1 | 4          | 7.4%   | 31       | 45.6% | <b>0.000</b> | 14             | 29.8%  | 21   | 28.0% | 0.840        | 8          | 27.6% | 27     | 29.0% | 1.000        |
|                 | T2 | 7          | 15.6%  | 26       | 48.1% | <b>0.001</b> | 9              | 29.0%  | 24   | 35.3% | 0.648        | 7          | 30.4% | 26     | 34.2% | 0.805        |
|                 | T3 | 2          | 6.5%   | 14       | 37.8% | <b>0.003</b> | 0              | 0.0%   | 16   | 24.2% | 1.000        | 5          | 27.8% | 11     | 22.0% | 0.747        |
| <b>IFNγ</b>     | T1 | 0          | 0.0%   | 3        | 4.4%  | 0.254        | 1              | 2.1%   | 2    | 2.7%  | 1.000        | 0          | 0.0%  | 3      | 3.2%  | 1.000        |
|                 | T2 | 1          | 2.2%   | 3        | 5.6%  | 0.624        | 1              | 3.2%   | 3    | 4.4%  | 1.000        | 1          | 4.3%  | 3      | 3.9%  | 1.000        |
|                 | T3 | 1          | 3.2%   | 2        | 5.4%  | 1.000        | 0              | 0.0%   | 3    | 4.5%  | 1.000        | 1          | 5.6%  | 2      | 4.0%  | 1.000        |
| <b>IL-2</b>     | T1 | 17         | 31.5%  | 2        | 3.0%  | <b>0.000</b> | 8              | 17.4%  | 11   | 14.7% | 0.798        | 8          | 27.6% | 11     | 12.0% | 0.075        |
|                 | T2 | 9          | 20.0%  | 2        | 3.7%  | <b>0.021</b> | 2              | 6.5%   | 9    | 13.2% | 0.494        | 5          | 21.7% | 6      | 7.9%  | 0.121        |
|                 | T3 | 7          | 22.6%  | 3        | 8.1%  | 0.167        | 0              | 0.0%   | 10   | 15.2% | 1.000        | 3          | 16.7% | 7      | 14.0% | 0.717        |
| <b>IL-12p70</b> | T1 | 2          | 3.7%   | 1        | 1.5%  | 0.583        | 0              | 0.0%   | 3    | 4.0%  | 0.284        | 1          | 3.4%  | 2      | 2.2%  | 0.560        |
|                 | T2 | 4          | 8.9%   | 0        | 0.0%  | <b>0.040</b> | 2              | 6.5%   | 2    | 2.9%  | 0.587        | 2          | 8.7%  | 2      | 2.6%  | 0.230        |
|                 | T3 | 3          | 9.7%   | 0        | 0.0%  | 0.090        | 0              | 0.0%   | 3    | 4.5%  | 1.000        | 1          | 5.6%  | 2      | 4.0%  | 1.000        |
| <b>IL-4</b>     | T1 | 11         | 20.4%  | 11       | 16.4% | 0.639        | 8              | 17.4%  | 14   | 18.7% | 1.000        | 9          | 31.0% | 13     | 14.1% | 0.053        |
|                 | T2 | 6          | 13.3%  | 5        | 9.3%  | 0.750        | 4              | 12.9%  | 7    | 10.3% | 0.736        | 4          | 17.4% | 7      | 9.2%  | 0.275        |
|                 | T3 | 8          | 25.8%  | 6        | 16.2% | 0.378        | 0              | 0.0%   | 14   | 21.2% | 1.000        | 3          | 16.7% | 11     | 22.0% | 0.745        |
| <b>IL-5</b>     | T1 | 9          | 16.7%  | 2        | 3.0%  | <b>0.012</b> | 3              | 6.5%   | 8    | 10.7% | 0.530        | 5          | 17.2% | 6      | 6.5%  | 0.131        |
|                 | T2 | 10         | 22.2%  | 1        | 1.9%  | <b>0.002</b> | 5              | 16.1%  | 6    | 8.8%  | 0.313        | 5          | 21.7% | 6      | 7.9%  | 0.121        |
|                 | T3 | 10         | 32.3%  | 3        | 8.1%  | <b>0.015</b> | 0              | 0.0%   | 13   | 19.7% | 1.000        | 6          | 33.3% | 7      | 14.0% | 0.090        |
| <b>IL-13</b>    | T1 | 9          | 16.7%  | 13       | 19.4% | 0.814        | 8              | 17.4%  | 14   | 18.7% | 1.000        | 10         | 34.5% | 12     | 13.0% | <b>0.014</b> |
|                 | T2 | 8          | 17.8%  | 8        | 14.8% | 0.787        | 5              | 16.1%  | 11   | 16.2% | 1.000        | 5          | 21.7% | 11     | 14.5% | 0.518        |
|                 | T3 | 6          | 19.4%  | 5        | 13.5% | 0.742        | 0              | 0.0%   | 11   | 16.7% | 1.000        | 5          | 27.8% | 6      | 12.0% | 0.144        |

|               |    |    |       |    |       |              |    |       |    |       |              |    |       |    |       |              |
|---------------|----|----|-------|----|-------|--------------|----|-------|----|-------|--------------|----|-------|----|-------|--------------|
| <b>IL-17A</b> | T1 | 16 | 29.6% | 3  | 4.5%  | <b>0.000</b> | 10 | 21.7% | 9  | 12.0% | 0.199        | 7  | 24.1% | 12 | 13.0% | 0.157        |
|               | T2 | 6  | 13.3% | 1  | 1.9%  | <b>0.044</b> | 1  | 3.2%  | 6  | 8.8%  | 0.429        | 3  | 13.0% | 4  | 5.3%  | 0.348        |
|               | T3 | 6  | 19.4% | 3  | 8.1%  | 0.282        | 0  | 0.0%  | 9  | 13.6% | 1.000        | 1  | 5.6%  | 8  | 16.0% | 0.427        |
| <b>IL-17F</b> | T1 | 20 | 37.0% | 16 | 23.9% | 0.161        | 17 | 37.0% | 19 | 25.3% | 0.220        | 14 | 48.3% | 22 | 23.9% | <b>0.019</b> |
|               | T2 | 13 | 28.9% | 11 | 20.4% | 0.355        | 8  | 25.8% | 16 | 23.5% | 1.000        | 9  | 39.1% | 15 | 19.7% | 0.093        |
|               | T3 | 8  | 25.8% | 9  | 24.3% | 1.000        | 0  | 0.0%  | 17 | 25.8% | 1.000        | 7  | 38.9% | 10 | 20.0% | 0.126        |
| <b>IL-21</b>  | T1 | 3  | 5.6%  | 10 | 14.9% | 0.141        | 5  | 10.9% | 8  | 10.7% | 1.000        | 4  | 13.8% | 9  | 9.8%  | 0.509        |
|               | T2 | 3  | 6.7%  | 7  | 13.0% | 0.340        | 5  | 16.1% | 5  | 7.4%  | 0.279        | 3  | 13.0% | 7  | 9.2%  | 0.694        |
|               | T3 | 2  | 6.5%  | 3  | 8.1%  | 1.000        | 0  | 0.0%  | 5  | 7.6%  | 1.000        | 2  | 11.1% | 3  | 6.0%  | 0.602        |
| <b>IL-22</b>  | T1 | 8  | 14.8% | 3  | 6.4%  | 0.213        | 5  | 14.3% | 6  | 9.1%  | 0.507        | 4  | 16.7% | 7  | 9.1%  | 0.286        |
|               | T2 | 7  | 15.6% | 4  | 9.8%  | 0.526        | 0  | 0.0%  | 11 | 18.3% | <b>0.030</b> | 4  | 20.0% | 7  | 10.6% | 0.272        |
|               | T3 | 4  | 12.9% | 4  | 12.9% | 1.000        | 0  | 0.0%  | 8  | 13.3% | 1.000        | 2  | 13.3% | 6  | 12.8% | 1.000        |
| <b>IL-6</b>   | T1 | 4  | 7.4%  | 0  | 0.0%  | <b>0.036</b> | 0  | 0.0%  | 4  | 5.3%  | 0.159        | 1  | 3.4%  | 3  | 3.2%  | 1.000        |
|               | T2 | 4  | 8.9%  | 1  | 1.9%  | 0.174        | 2  | 6.5%  | 3  | 4.4%  | 0.647        | 3  | 13.0% | 2  | 2.6%  | 0.08         |
|               | T3 | 2  | 6.5%  | 0  | 0.0%  | 0.204        | 0  | 0.0%  | 2  | 3.0%  | 1.000        | 1  | 5.6%  | 1  | 2.0%  | 0.462        |
| <b>IL-9</b>   | T1 | 11 | 20.4% | 4  | 6.0%  | <b>0.025</b> | 3  | 6.5%  | 12 | 16.0% | 0.161        | 7  | 24.1% | 8  | 8.7%  | <b>0.048</b> |
|               | T2 | 6  | 13.3% | 6  | 11.1% | 0.766        | 2  | 6.5%  | 10 | 14.7% | 0.331        | 3  | 13.0% | 9  | 11.8% | 1.000        |
|               | T3 | 7  | 22.6% | 6  | 16.2% | 0.549        | 0  | 0.0%  | 13 | 19.7% | 1.000        | 3  | 16.7% | 10 | 20.0% | 1.000        |
| <b>GM-CSF</b> | T1 | 2  | 3.7%  | 1  | 1.5%  | 0.583        | 2  | 4.3%  | 1  | 1.3%  | 0.558        | 0  | 0.0%  | 3  | 3.2%  | 1.000        |
|               | T2 | 2  | 4.4%  | 4  | 7.4%  | 0.686        | 1  | 3.2%  | 5  | 7.4%  | 0.662        | 2  | 8.7%  | 4  | 5.3%  | 0.621        |
|               | T3 | 2  | 6.5%  | 0  | 0.0%  | 0.204        | 0  | 0.0%  | 2  | 3.0%  | 1.000        | 0  | 0.0%  | 2  | 4.0%  | 1.000        |
| <b>IL-10</b>  | T1 | 7  | 13.0% | 0  | 0.0%  | <b>0.003</b> | 1  | 2.1%  | 6  | 8.0%  | 0.247        | 3  | 10.3% | 4  | 4.3%  | 0.355        |
|               | T2 | 7  | 15.6% | 3  | 5.6%  | 0.178        | 4  | 12.9% | 6  | 8.8%  | 0.720        | 3  | 13.0% | 7  | 9.2%  | 0.694        |
|               | T3 | 5  | 16.1% | 0  | 0.0%  | <b>0.016</b> | 0  | 0.0%  | 5  | 7.6%  | 1.000        | 1  | 5.6%  | 4  | 8.0%  | 1.000        |

**Supplementary Table 2. Systemic cytokines across pregnancy according to HIV status, preterm birth status and small-for-gestational-age (SGA) status.** Cytokines and chemokines were measured in maternal plasma collected during the first, second and third trimester. Data presented are the number and percentage of samples in which cytokines were detected by multiplex cytokine assay. The Chi-square test or Fisher's exact test was used for statistical comparisons as appropriate.

|                         | Trimester |       |    |       |    |       | Delivery | Postnatal | P  |              |                   |
|-------------------------|-----------|-------|----|-------|----|-------|----------|-----------|----|--------------|-------------------|
|                         | 1         |       | 2  |       | 3  |       |          |           |    |              |                   |
|                         | n         |       | n  |       | n  |       |          |           |    |              |                   |
| <b>All Women</b>        |           |       |    |       |    |       |          |           |    |              |                   |
| <b>Pro-inflammatory</b> | 101       | 82.8% | 92 | 92.9% | 61 | 89.7% |          |           |    | 0.062        |                   |
| <b>Anti-viral</b>       | 46        | 37.7% | 55 | 55.6% | 98 | 56.7% |          |           |    | <b>0.009</b> |                   |
| <b>Th1</b>              | 22        | 18.0% | 17 | 17.2% | 13 | 19.1% |          |           |    | 0.950        |                   |
| <b>Th2</b>              | 31        | 25.6% | 28 | 28.8% | 23 | 33.8% |          |           |    | 0.486        |                   |
| <b>Th17</b>             | 47        | 38.8% | 37 | 37.4% | 21 | 30.9% |          |           |    | 0.537        |                   |
| <b>Pleiotropic</b>      | 20        | 16.4% | 19 | 19.2% | 14 | 20.6% |          |           |    | 0.746        |                   |
| <b>HIV+ women</b>       |           |       |    |       |    |       |          |           |    |              |                   |
| <b>Pro-inflammatory</b> | 54        | 100%  | 45 | 100%  | 31 | 100%  | 11       | 100%      | 18 | 100%         | --                |
| <b>Anti-viral</b>       | 13        | 24.1% | 25 | 55.6% | 22 | 71.0% | 3        | 27.3%     | 0  | 0.0%         | <b>&lt;0.0001</b> |
| <b>Th1</b>              | 17        | 31.5% | 12 | 26.7% | 8  | 25.8% | 4        | 36.4%     | 2  | 11.1%        | 0.499             |
| <b>Th2</b>              | 13        | 24.1% | 16 | 35.6% | 14 | 45.2% | 3        | 27.3%     | 1  | 5.6%         | <b>0.037</b>      |
| <b>Th17</b>             | 22        | 40.7% | 15 | 33.3% | 9  | 29.0% | 5        | 45.5%     | 6  | 33.3%        | 0.772             |
| <b>Pleiotropic</b>      | 15        | 27.8% | 10 | 22.2% | 8  | 25.8% | 3        | 27.3%     | 3  | 16.7%        | 0.893             |
| <b>HIV- women</b>       |           |       |    |       |    |       |          |           |    |              |                   |
| <b>Pro-inflammatory</b> | 47        | 69.1% | 47 | 87.0% | 30 | 81.1% |          |           |    |              | 0.052             |
| <b>Anti-viral</b>       | 33        | 48.5% | 30 | 55.6% | 16 | 44.4% |          |           |    |              | 0.557             |
| <b>Th1</b>              | 5         | 7.4%  | 5  | 9.3%  | 5  | 13.5% |          |           |    |              | 0.587             |
| <b>Th2</b>              | 18        | 26.9% | 12 | 22.2% | 9  | 24.3% |          |           |    |              | 0.839             |
| <b>Th17</b>             | 25        | 37.3% | 22 | 40.7% | 12 | 32.4% |          |           |    |              | 0.723             |
| <b>Pleiotropic</b>      | 5         | 7.4%  | 9  | 16.7% | 6  | 16.2% |          |           |    |              | 0.228             |

**Supplementary Table 3. Systemic cytokine subgroups across pregnancy.** Cytokines and chemokines were measured in maternal plasma collected during the first, second and third trimester in all women studied (both women living with HIV (HIV+ women) and HIV-negative women (HIV- women)), as well as at delivery and six weeks postnatal for 11 and 18 women living with HIV, respectively. Data presented are the number and percentage of samples in which subgroups of cytokines were detected, i.e. pro-inflammatory (IL-1 $\beta$ , TNF- $\alpha$ , IP-10, IL-8), anti-viral (IFN $\alpha$ 2, IFN $\beta$ , IFN $\lambda$ 1, IFN $\lambda$ 2/3), Th1 (IFN $\gamma$ , IL-2, IL-12p70), Th2 (IL-4, IL-5, IL-13), Th17 (IL-17A, IL-17F, IL-21, IL-22) and pleiotropic (IL-6, IL-9, GM-CSF, IL-10) cytokines. The Chi-square test or Fisher's exact test was used for statistical comparisons as appropriate.

|                         |    | HIV Status |       |    |          |                   | Preterm Status |          |    |          |              | SGA Status |          |     |          |              |          |  |
|-------------------------|----|------------|-------|----|----------|-------------------|----------------|----------|----|----------|--------------|------------|----------|-----|----------|--------------|----------|--|
|                         |    | Positive   |       |    | Negative |                   | <i>P</i>       | Preterm  |    | Term     |              |            | <i>P</i> | SGA |          | no SGA       |          |  |
|                         |    | <i>n</i>   |       |    | <i>n</i> |                   |                | <i>n</i> |    | <i>n</i> |              | <i>n</i>   |          |     | <i>n</i> |              | <i>n</i> |  |
| <b>Pro-inflammatory</b> | T1 | 54         | 100%  | 47 | 69.1%    | <b>&lt;0.0001</b> | 38             | 80.9%    | 63 | 84.0%    | 0.654        | 26         | 89.7%    | 60  | 76.9%    | 0.178        |          |  |
|                         | T2 | 45         | 100%  | 47 | 87.0%    | <b>0.015</b>      | 29             | 93.6%    | 63 | 92.7%    | >0.99        | 22         | 95.7%    | 56  | 90.3%    | 0.668        |          |  |
|                         | T3 | 31         | 100%  | 30 | 81.1%    | <b>0.013</b>      | 2              | 100%     | 59 | 89.4%    | >0.99        | 16         | 88.9%    | 35  | 87.5%    | >0.99        |          |  |
| <b>Anti-viral</b>       | T1 | 13         | 24.1% | 33 | 48.5%    | <b>0.006</b>      | 20             | 42.6%    | 26 | 34.7%    | 0.382        | 9          | 31.0%    | 28  | 33.3%    | 0.820        |          |  |
|                         | T2 | 25         | 55.6% | 24 | 55.6%    | >0.99             | 19             | 61.3%    | 36 | 52.9%    | 0.438        | 14         | 60.9%    | 33  | 48.5%    | 0.306        |          |  |
|                         | T3 | 22         | 71.0% | 16 | 44.4%    | <b>0.029</b>      | 2              | 100%     | 36 | 55.4%    | 0.502        | 12         | 66.7%    | 20  | 46.5%    | 0.151        |          |  |
| <b>Th1</b>              | T1 | 17         | 31.5% | 5  | 7.4%     | <b>0.0006</b>     | 9              | 19.2%    | 13 | 17.3     | 0.800        | 8          | 27.6%    | 12  | 13.2%    | 0.070        |          |  |
|                         | T2 | 12         | 26.7% | 5  | 9.3%     | <b>0.022</b>      | 5              | 16.1%    | 12 | 17.7%    | 0.853        | 6          | 26.1%    | 10  | 13.3%    | 0.148        |          |  |
|                         | T3 | 8          | 25.8% | 5  | 13.5%    | 0.199             | 0              | 0.0%     | 13 | 19.7%    | >0.99        | 4          | 22.2%    | 7   | 14.6%    | 0.474        |          |  |
| <b>Th2</b>              | T1 | 13         | 24.1% | 18 | 26.9%    | 0.727             | 12             | 26.1%    | 19 | 25.3%    | 0.927        | 12         | 41.4%    | 16  | 18.0%    | <b>0.010</b> |          |  |
|                         | T2 | 16         | 35.6% | 12 | 22.2%    | 0.143             | 10             | 32.3%    | 18 | 26.5%    | 0.553        | 10         | 43.5%    | 13  | 18.3%    | <b>0.015</b> |          |  |
|                         | T3 | 14         | 45.2% | 9  | 24.3%    | 0.071             | 0              | 0.0%     | 23 | 34.9%    | 0.546        | 8          | 44.4%    | 12  | 25.5%    | 0.139        |          |  |
| <b>Th17</b>             | T1 | 22         | 40.7% | 25 | 37.3%    | 0.701             | 23             | 50.0%    | 24 | 32.0%    | <b>0.049</b> | 16         | 55.2%    | 24  | 28.2%    | <b>0.009</b> |          |  |
|                         | T2 | 15         | 33.3% | 22 | 40.7%    | 0.448             | 13             | 41.9%    | 24 | 35.3%    | 0.526        | 11         | 47.8%    | 19  | 27.5%    | 0.072        |          |  |
|                         | T3 | 9          | 42.9% | 12 | 57.1%    | 0.763             | 0              | 0.0%     | 21 | 31.8%    | >0.99        | 8          | 44.4%    | 11  | 22.9%    | 0.085        |          |  |
| <b>Pleiotropic</b>      | T1 | 15         | 27.8% | 5  | 7.4%     | <b>0.003</b>      | 5              | 10.6%    | 15 | 20.0%    | 0.174        | 7          | 24.1%    | 10  | 11.1%    | 0.081        |          |  |
|                         | T2 | 10         | 22.2% | 9  | 16.7%    | 0.485             | 5              | 16.1%    | 14 | 20.6%    | 0.601        | 6          | 26.1%    | 8   | 11.3%    | 0.083        |          |  |
|                         | T3 | 8          | 25.8% | 6  | 16.2%    | 0.330             | 0              | 0.0%     | 14 | 21.2%    | >0.99        | 3          | 16.7%    | 8   | 17.0%    | >0.99        |          |  |

**Supplementary Table 4. Systemic cytokine subgroups across pregnancy according to HIV status, preterm birth status and small-for-gestational-age (SGA) status.** Cytokines and chemokines were measured in maternal plasma collected during the first, second and third trimester. Data presented are the number and percentage of samples in which subgroups of cytokines were detected, i.e. pro-inflammatory (IL-1 $\beta$ , TNF- $\alpha$ , IP-10, IL-8), anti-viral (IFN $\alpha$ 2, IFN $\beta$ , IFN $\lambda$ 1, IFN $\lambda$ 2/3), Th1 (IFN $\gamma$ , IL-2, IL-12p70), Th2 (IL-4, IL-5, IL-13), Th17 (IL-17A, IL-17F, IL-21, IL-22) and pleiotropic (IL-6, IL-9, GM-CSF, IL-10) cytokines. The Chi-square test or Fisher's exact test was used for statistical comparisons as appropriate.
